# Supplementary material for: Quantification of mesocosm fish and amphibian species diversity via environmental DNA metabarcoding
Source: PubMed Central journal article supplement — Mol Ecol Resour. 2015 Jun 18;16(1):29–41. doi: 10.1111/1755-0998.12433 (PMC4744776; doi:10.1111/1755-0998.12433), 2015-06-18

1 Fig. S1 Iteratively reweighted least square regressions of cumulative biomass of all species  
2 combined (g) and read abundance of all species combined (number of mapped reads) for each of  
3 the six primer sets. Iteratively reweighted least square regression analysis results in fitting the  
4 linear model to reweighted data (closed points) exclusive of outliers (open points). Data pooled  
5 from all mesocosms (n=108).

6 Fig. S2 Iteratively reweighted least square regressions of standing stock biomass (g) and read  
7 abundance (number of mapped reads) for each species for the Ac12s primer. Iteratively  
8 reweighted least square regression analysis results in fitting the linear model to reweighted data  
9 (closed points) exclusive of outliers (open points). Data pooled by species from each of the  
10 independent mesocosms (n=12).

11 Fig. S3 Iteratively reweighted least square regressions of standing stock biomass (g) and read  
12 abundance (number of mapped reads) for each species for the Ac16s primer. Iteratively  
13 reweighted least square regression analysis results in fitting the linear model to reweighted data  
14 (closed points) exclusive of outliers (open points). Data pooled by species from each of the  
15 independent mesocosms (n=12).

16 Fig. S4 Iteratively reweighted least square regressions of standing stock biomass (g) and read  
17 abundance (number of mapped reads) for each species for the L14912/H15149c primer.  
18 Iteratively reweighted least square regression analysis results in fitting the linear model to  
19 reweighted data (closed points) exclusive of outliers (open points). Data pooled by species from  
20 each of the independent mesocosms (n=12).

21 Fig. S5 Iteratively reweighted least square regressions of standing stock biomass (g) and read  
22 abundance (number of mapped reads) for each species for the L2513/H2714 primer. Iteratively  
23 reweighted least square regression analysis results in fitting the linear model to reweighted data  
24 (closed points) exclusive of outliers (open points). Data pooled by species from each of the  
25 independent mesocosms (n=12).

26 Fig. S6 Iteratively reweighted least square regressions of standing stock biomass (g) and read  
27 abundance (number of mapped reads) for each species for the Ve16s primer. Iteratively  
28 reweighted least square regression analysis results in fitting the linear model to reweighted data  
29 (closed points) exclusive of outliers (open points). Data pooled by species from each of the  
30 independent mesocosms (n=12).

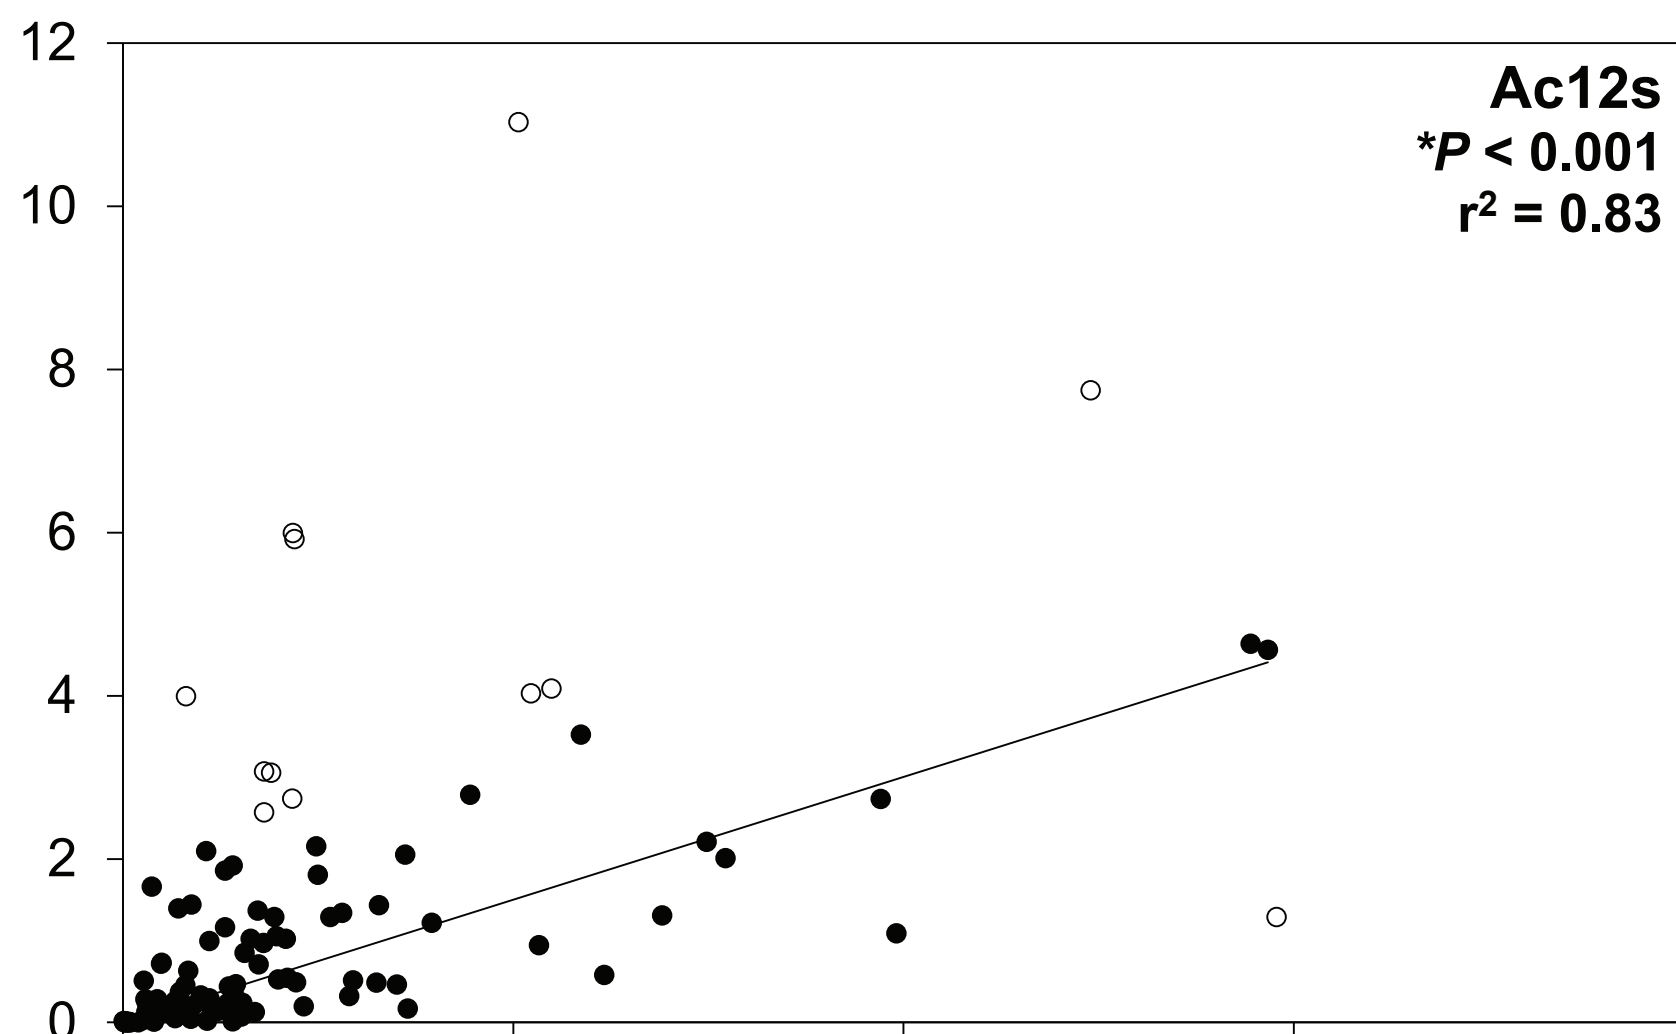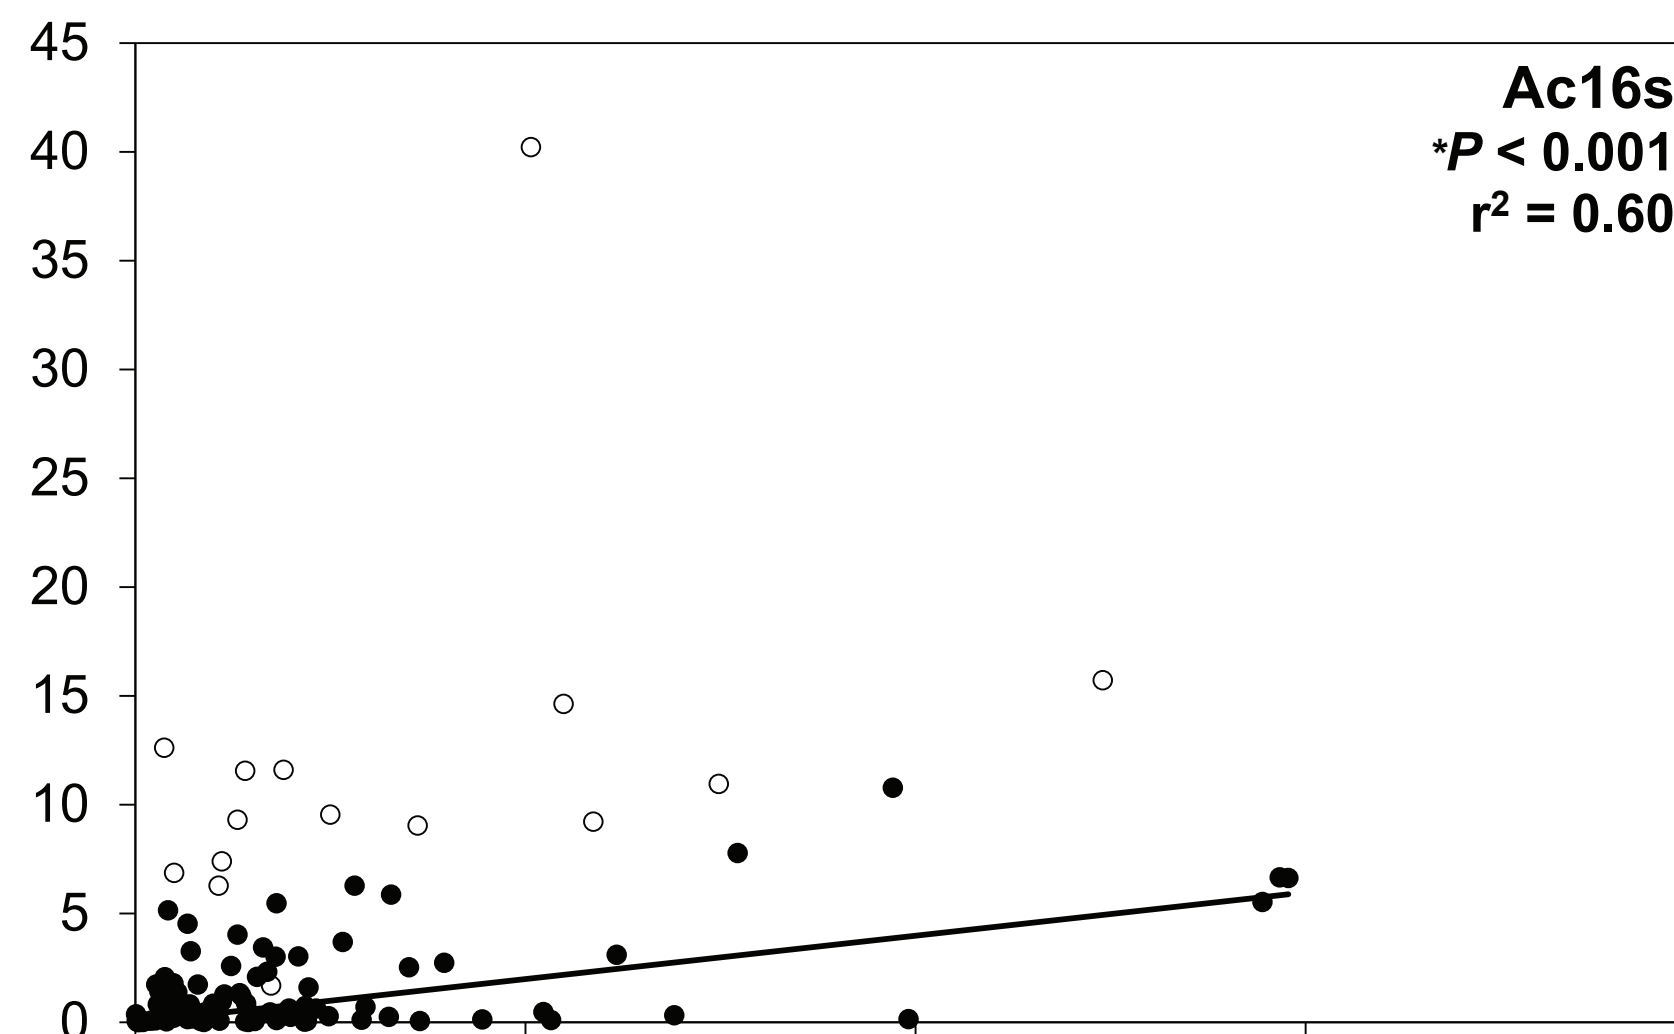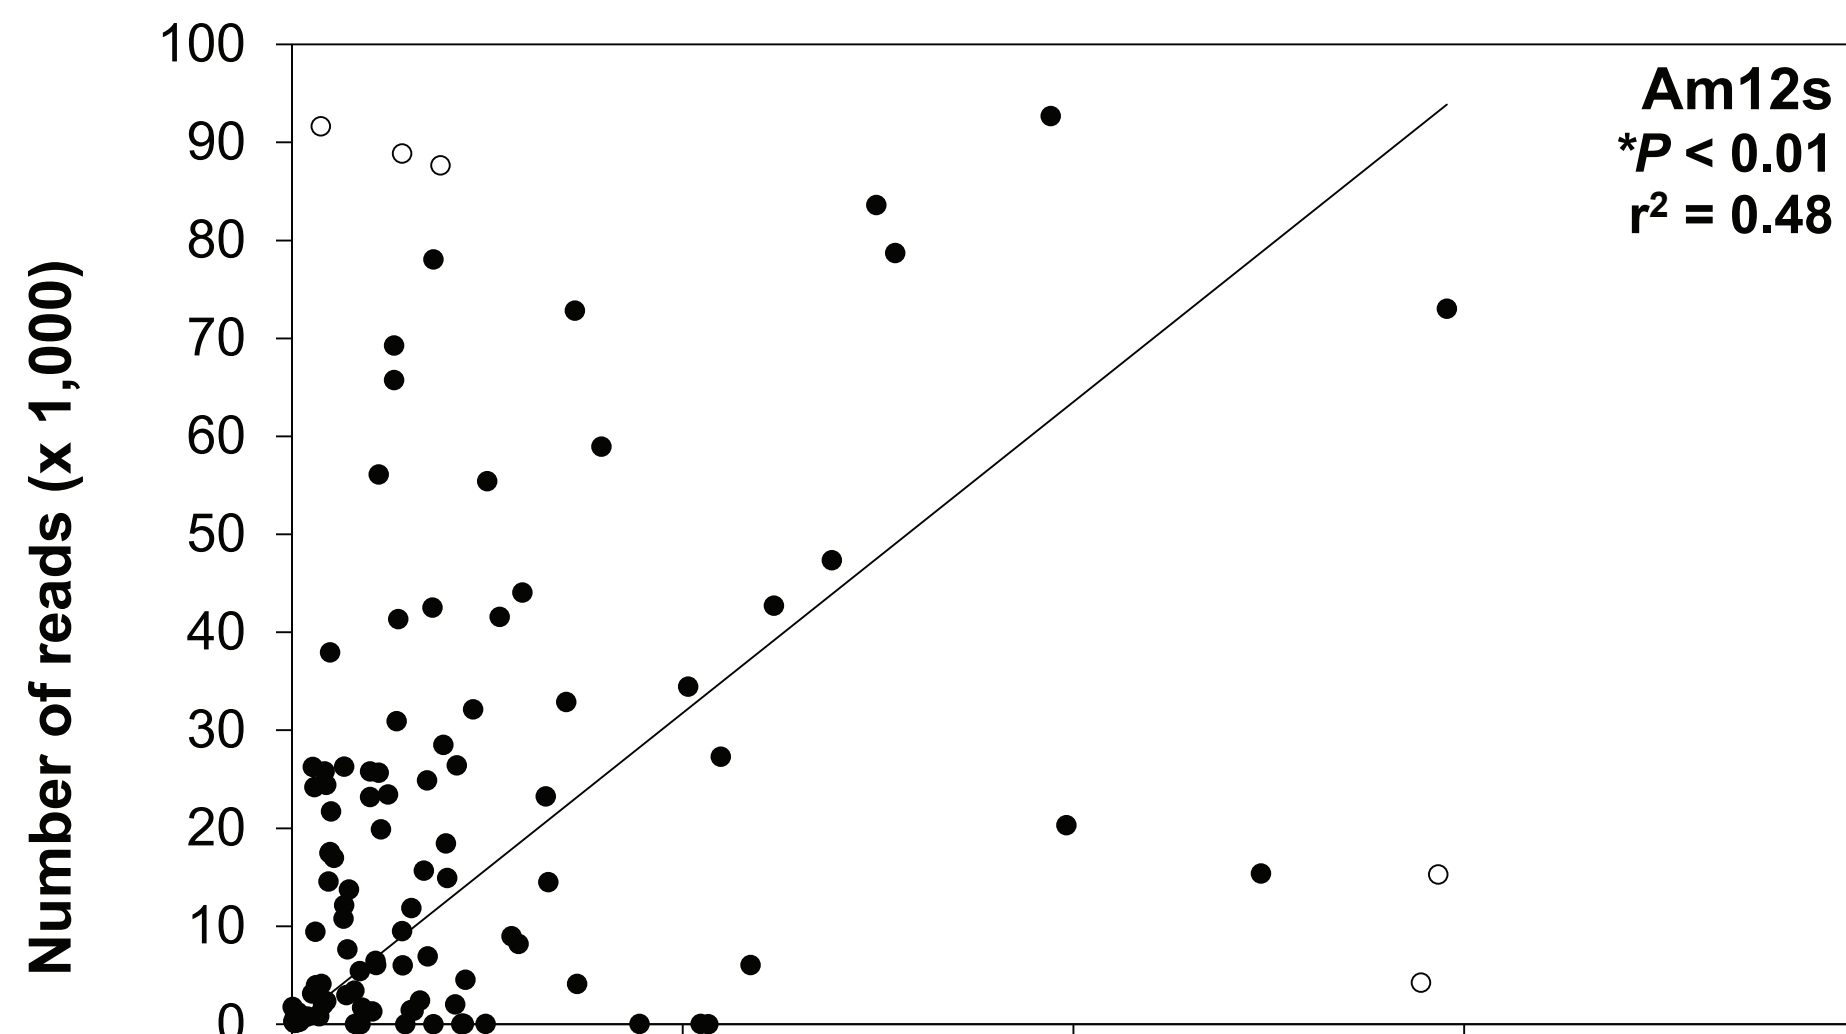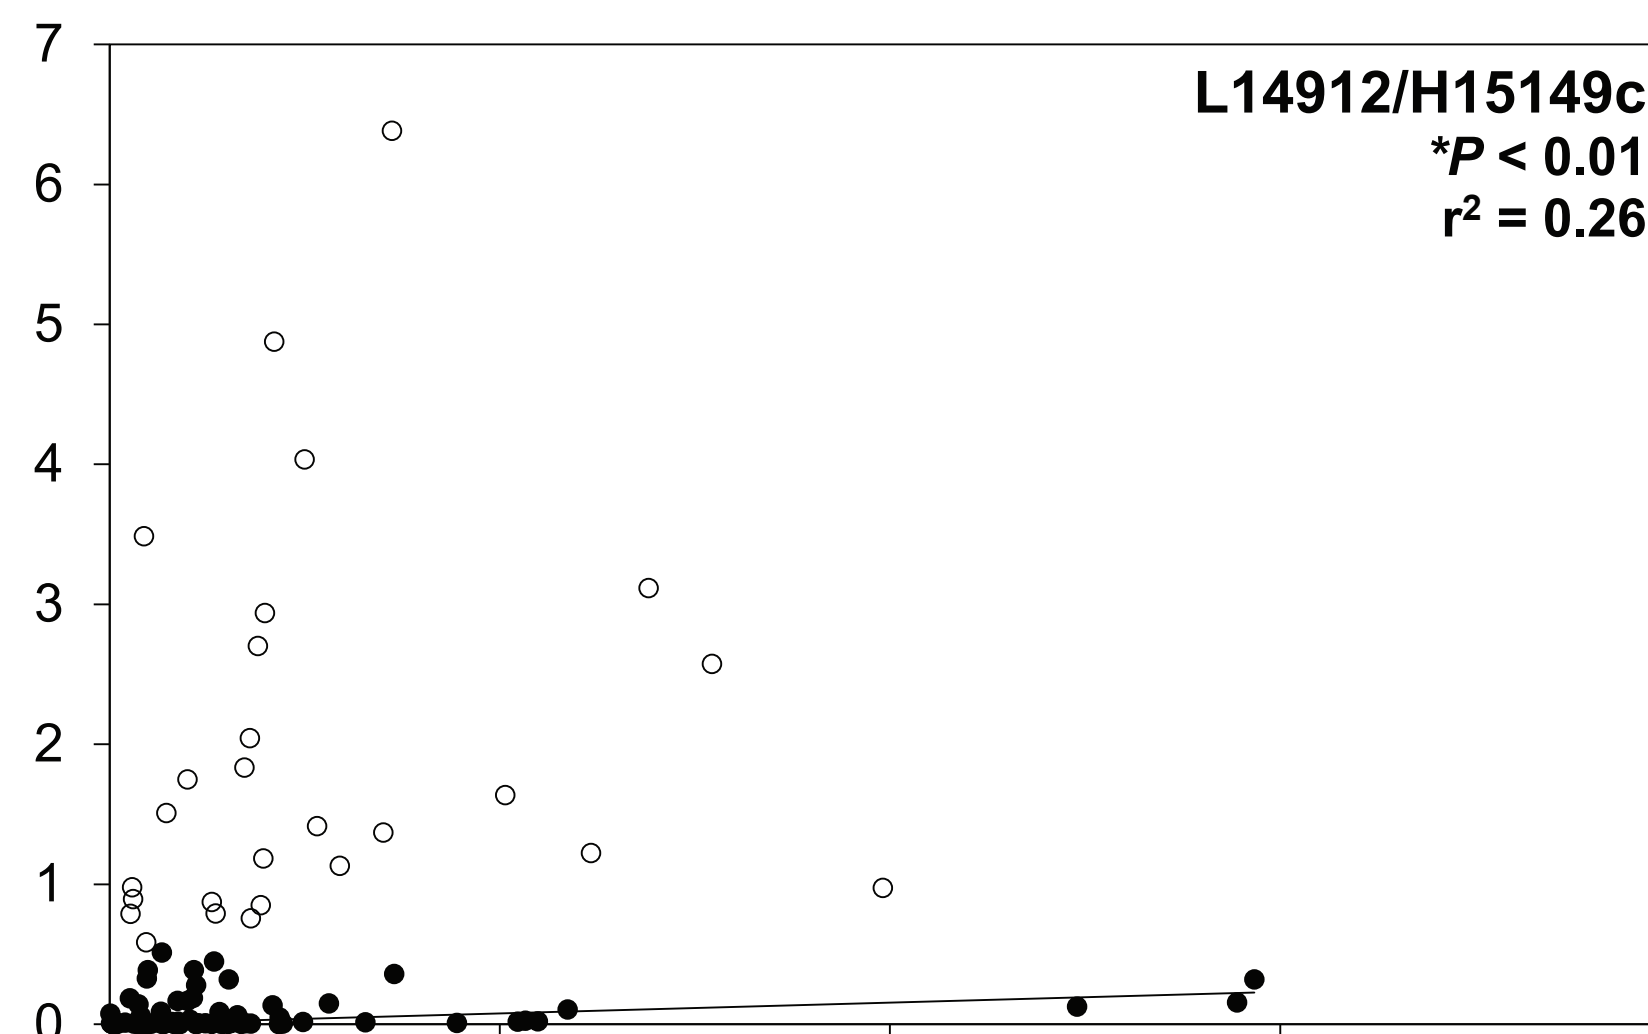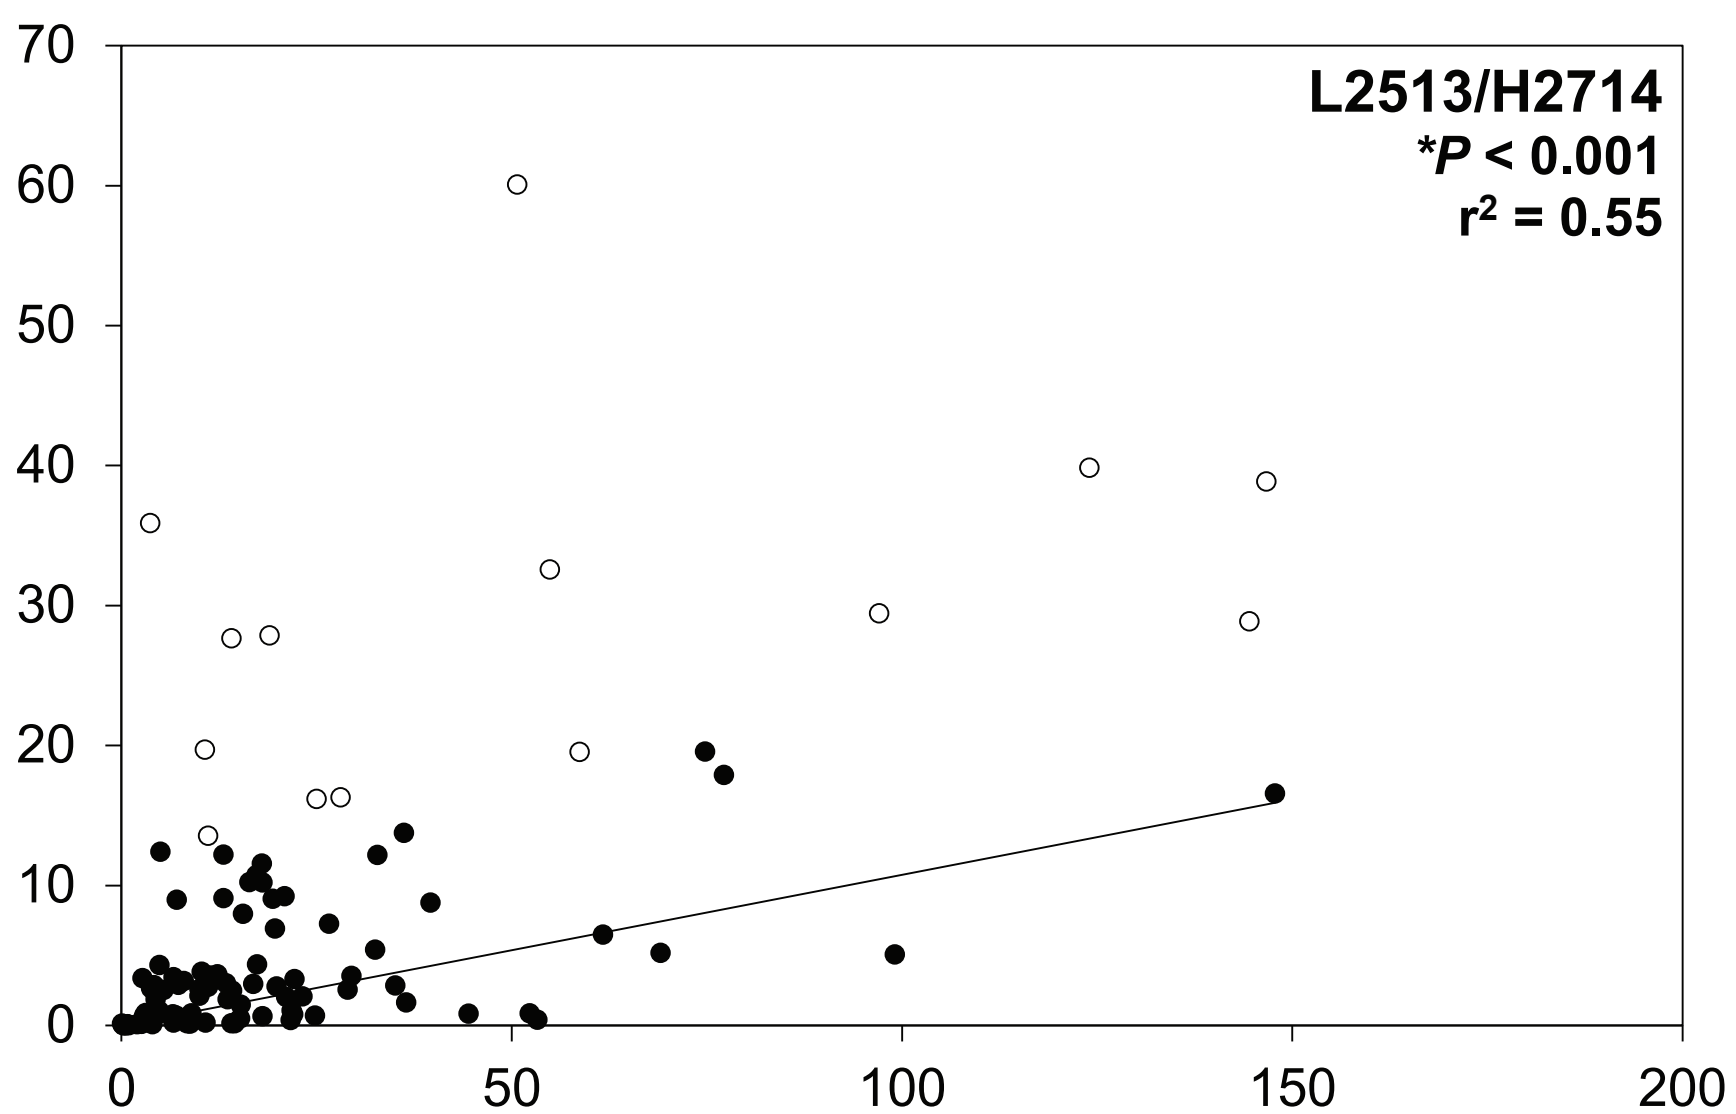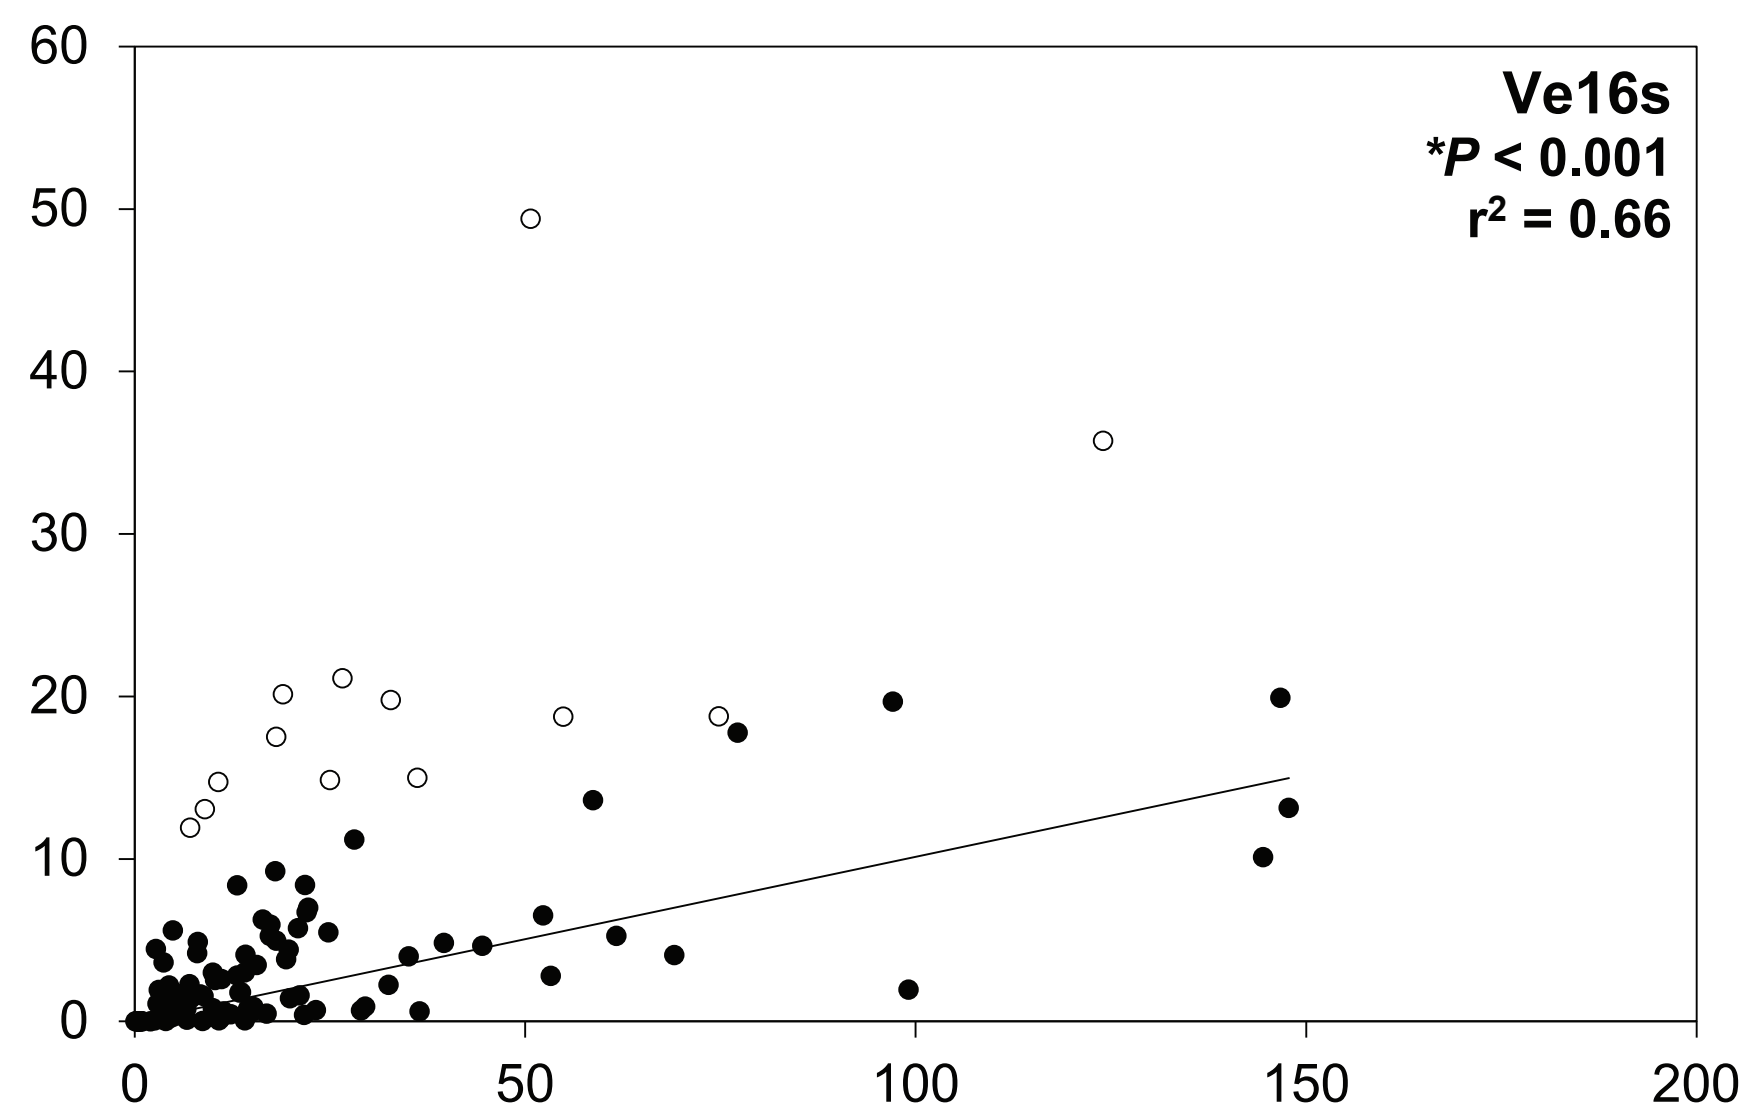

Cumulative Biomass (g)

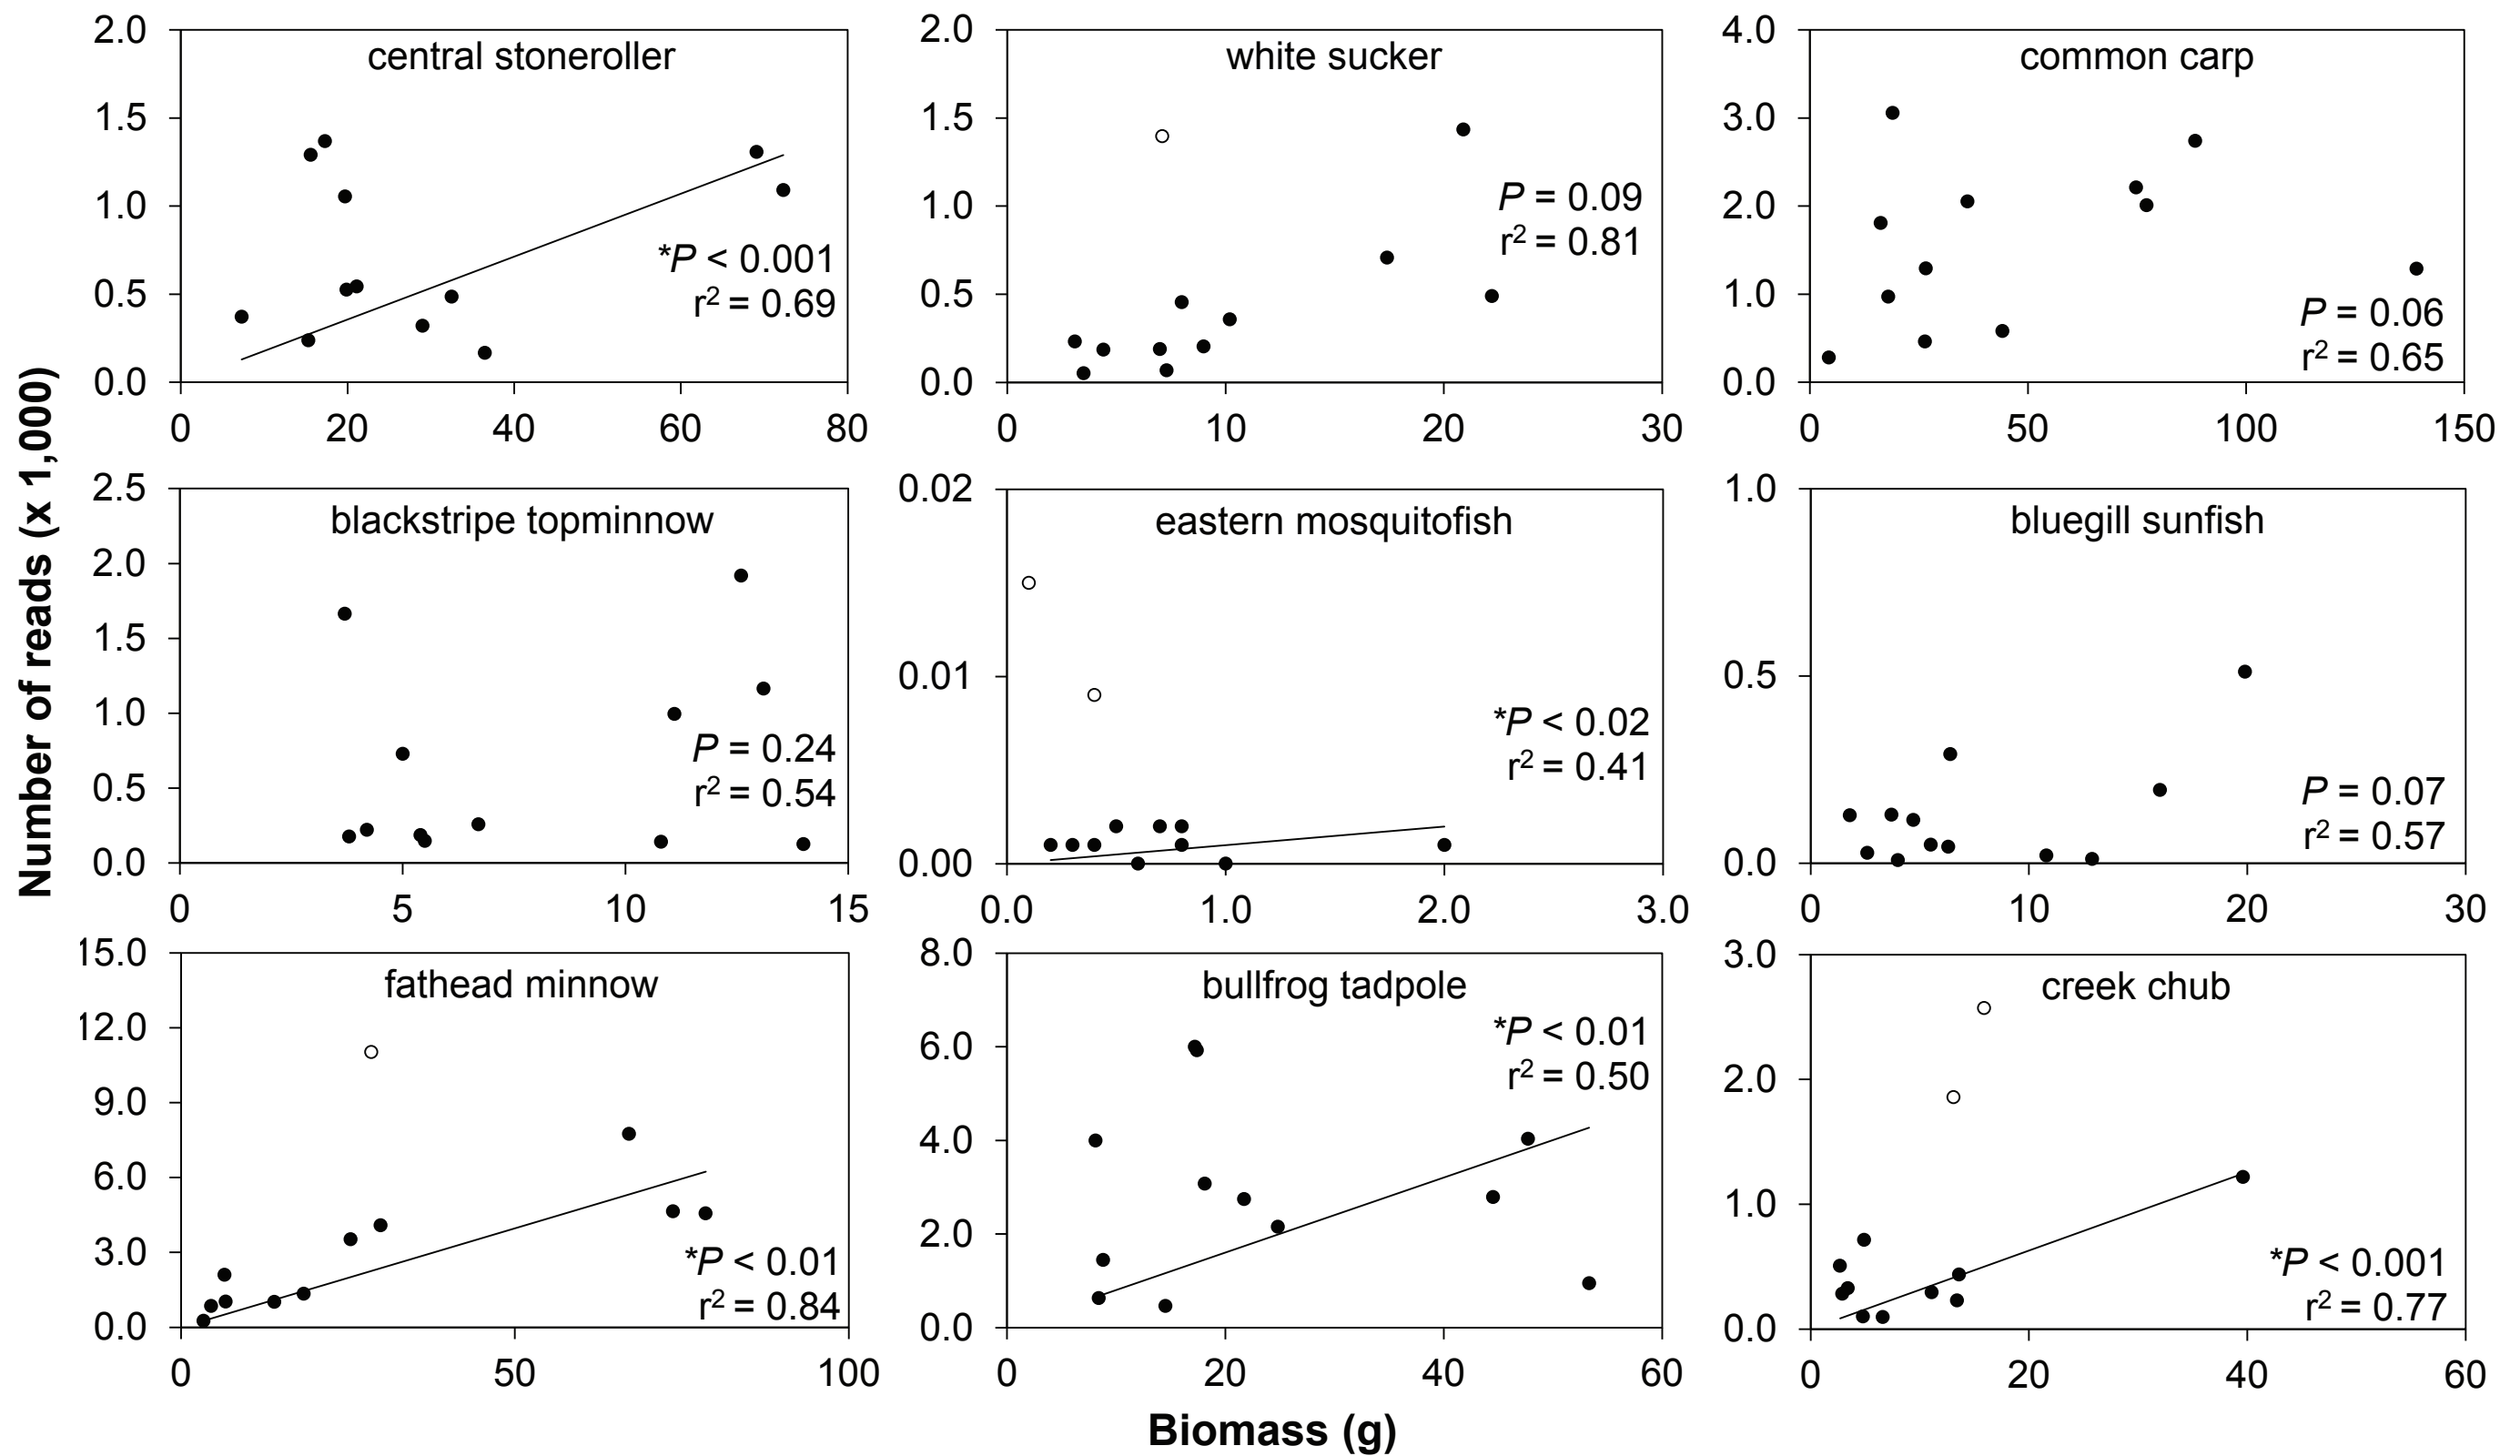

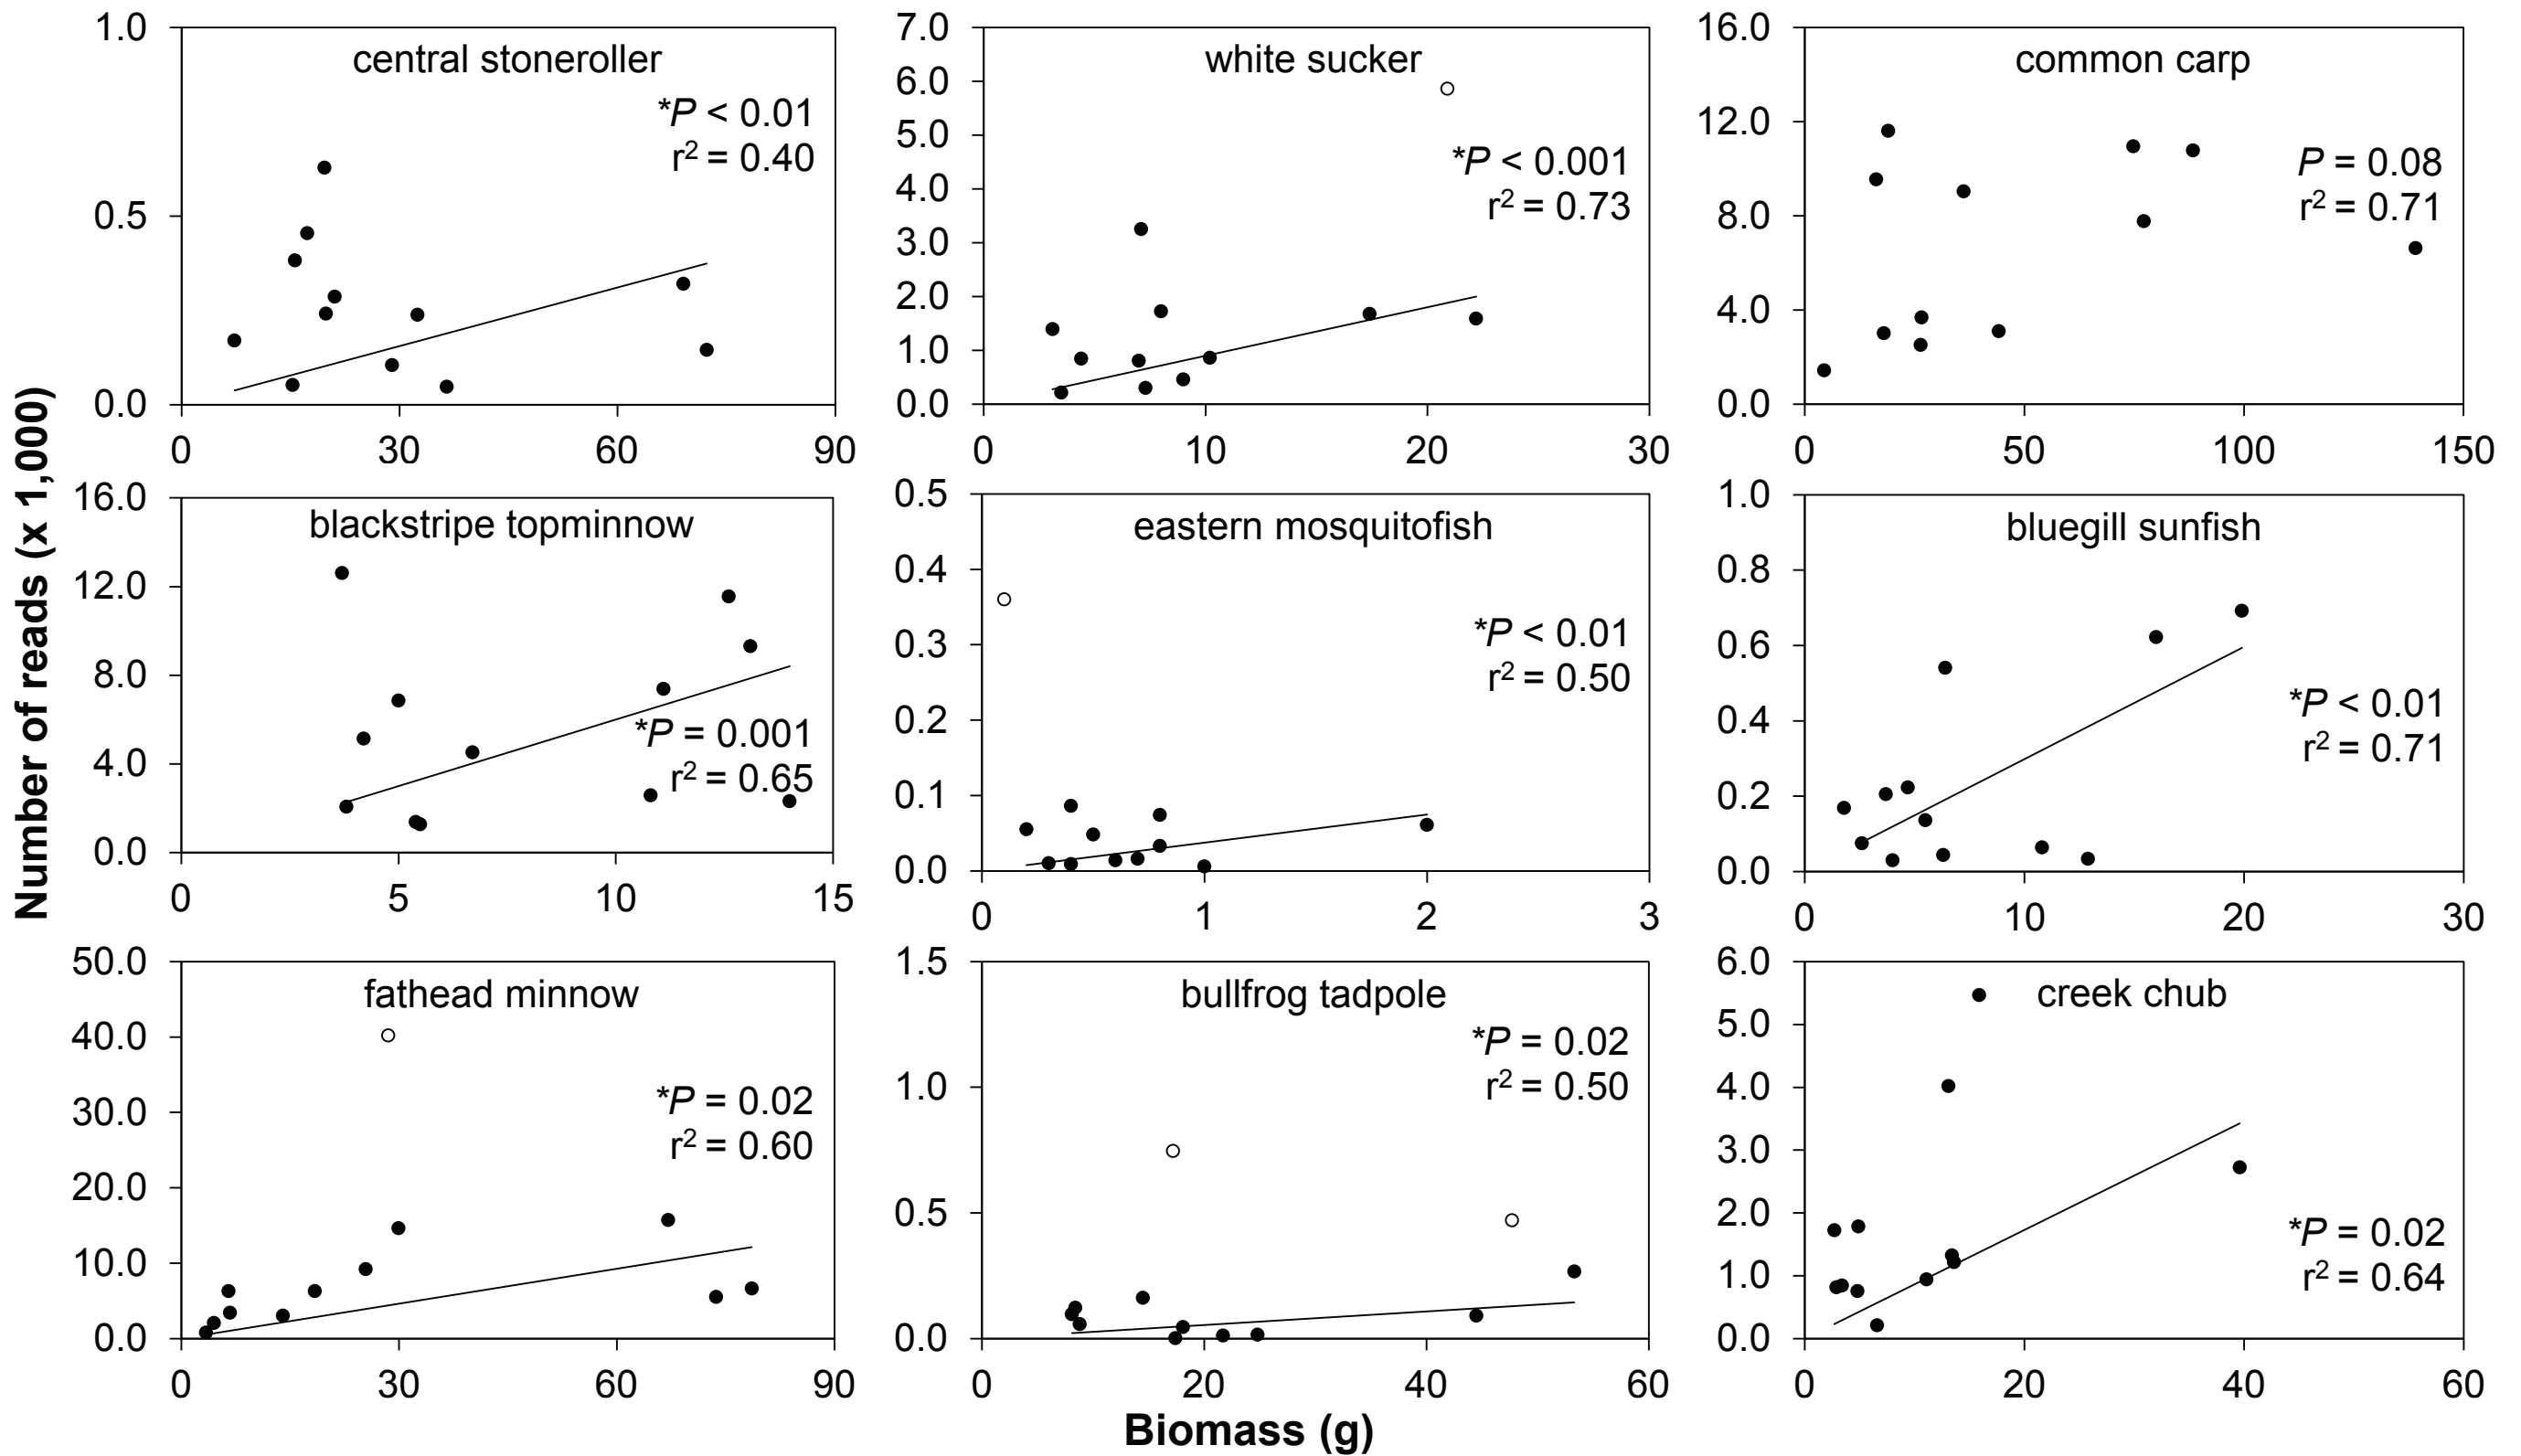

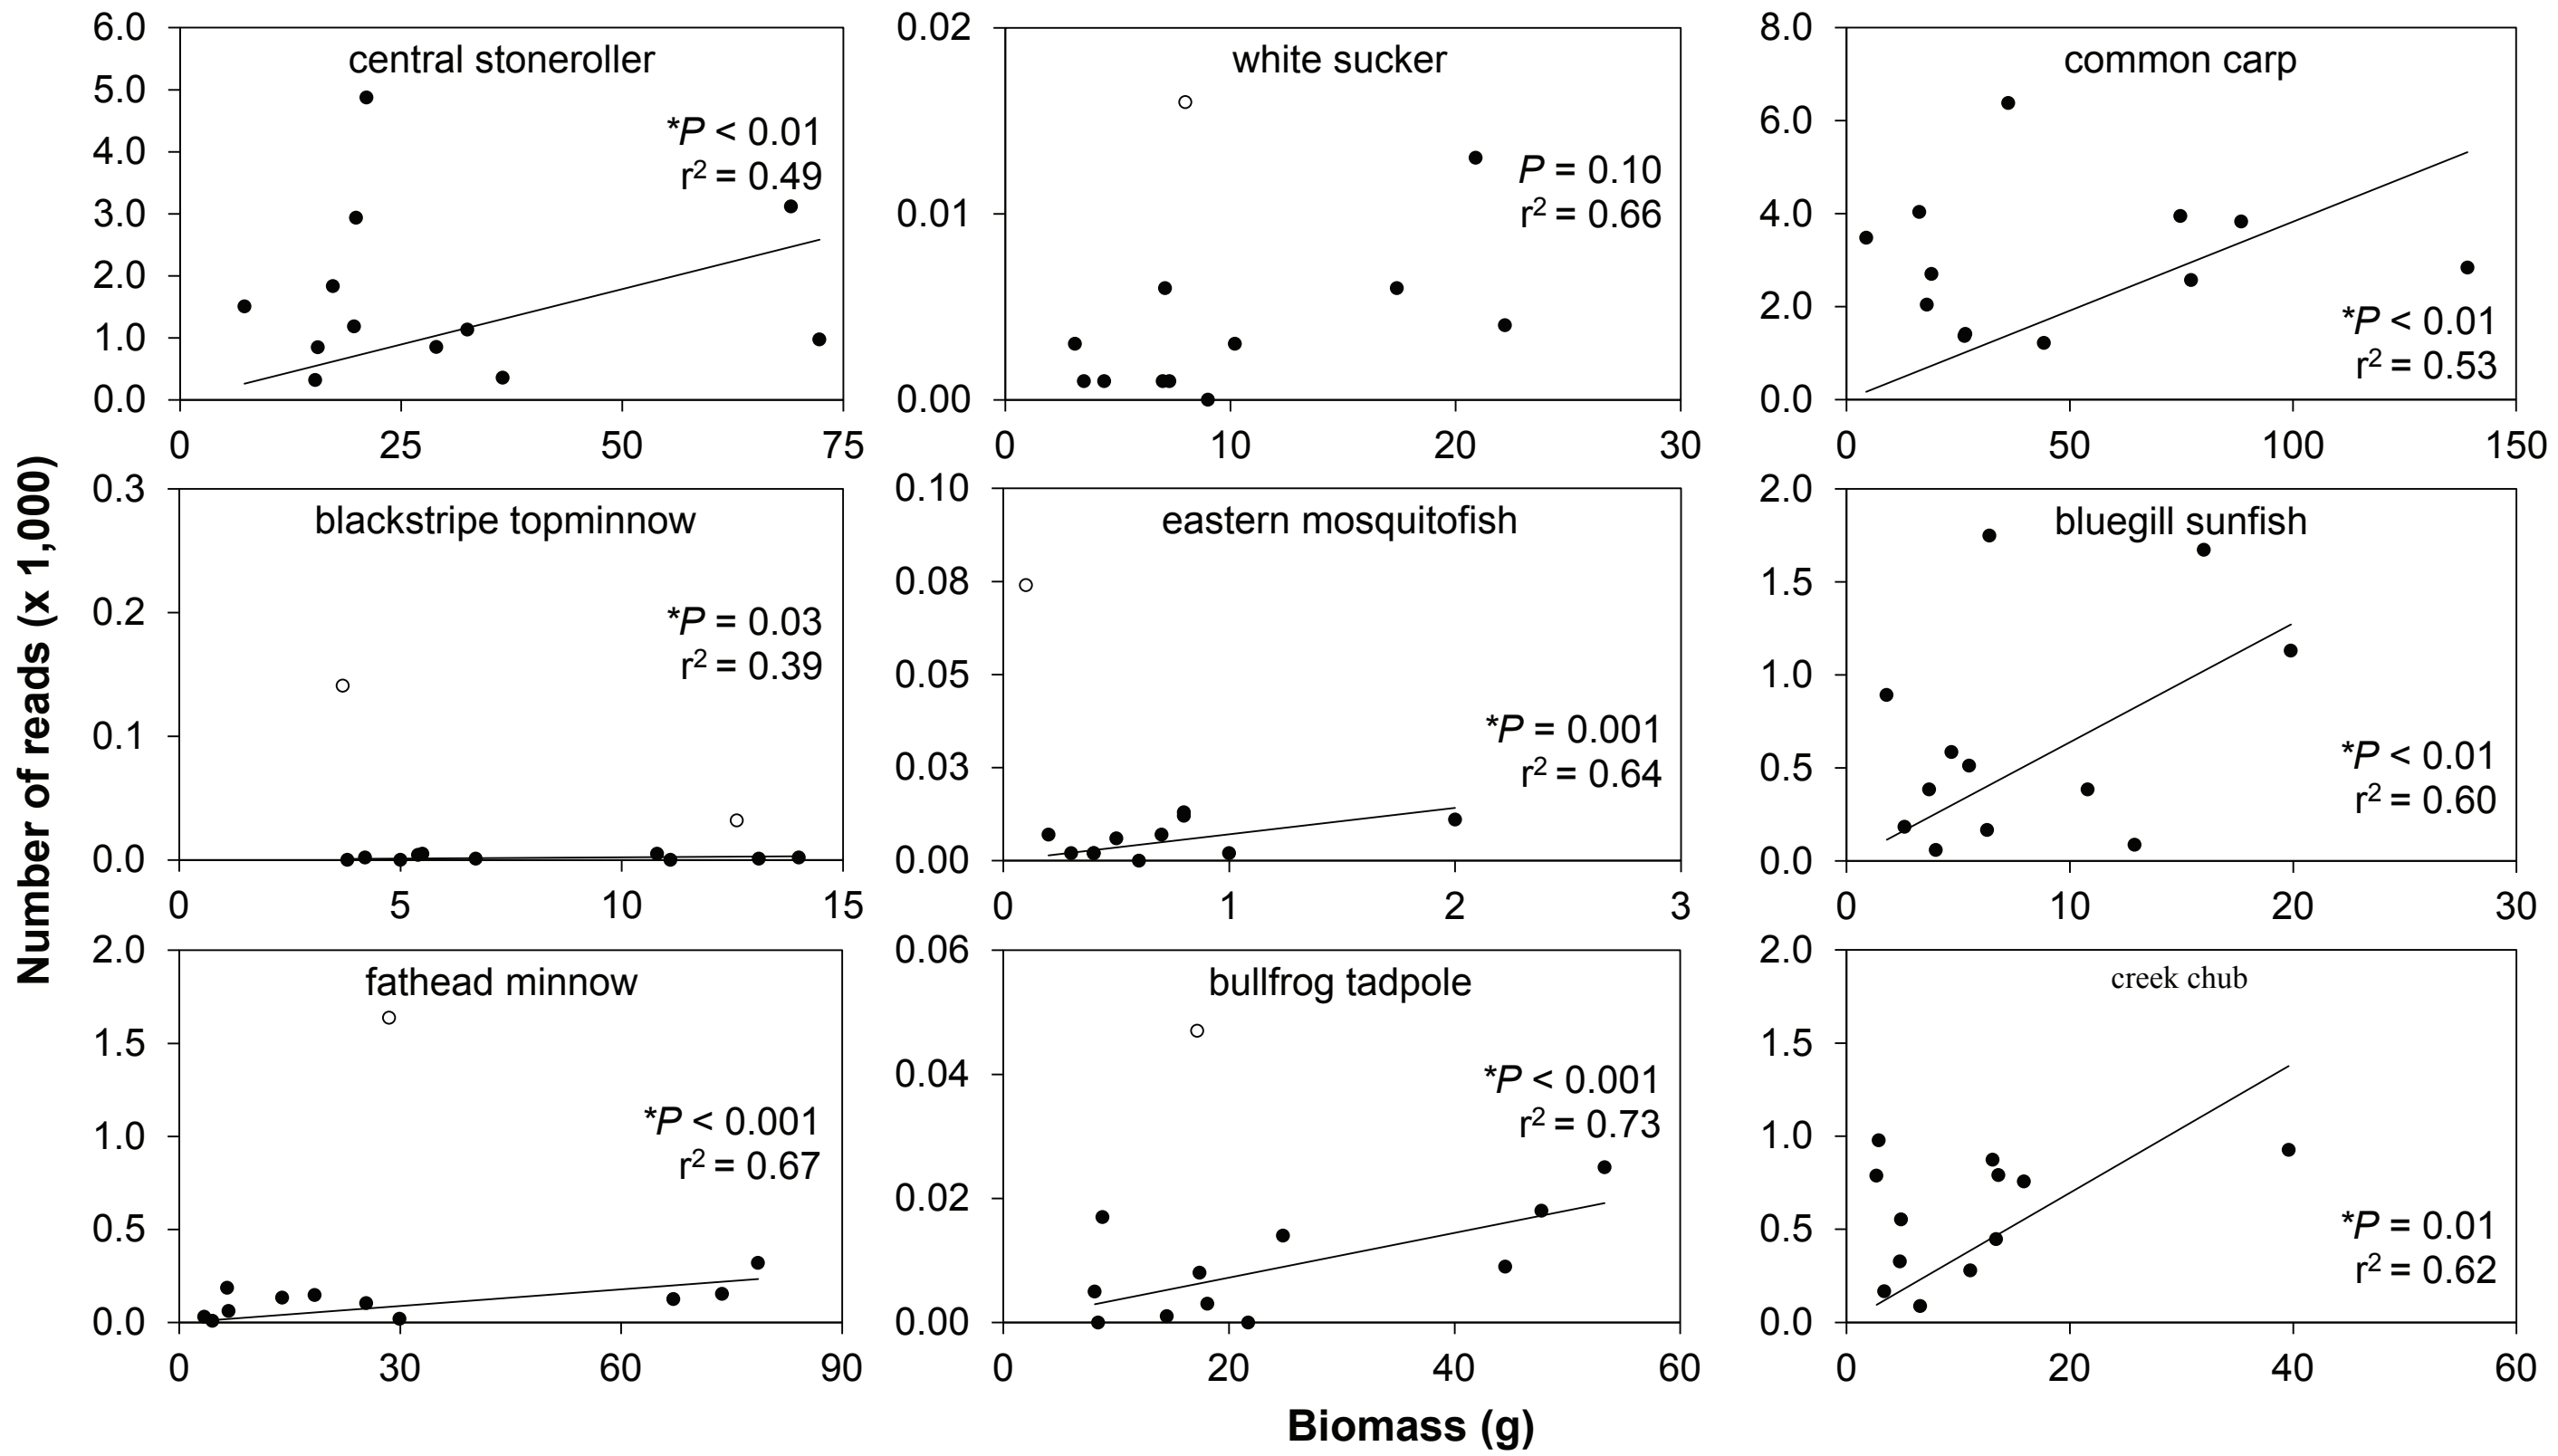

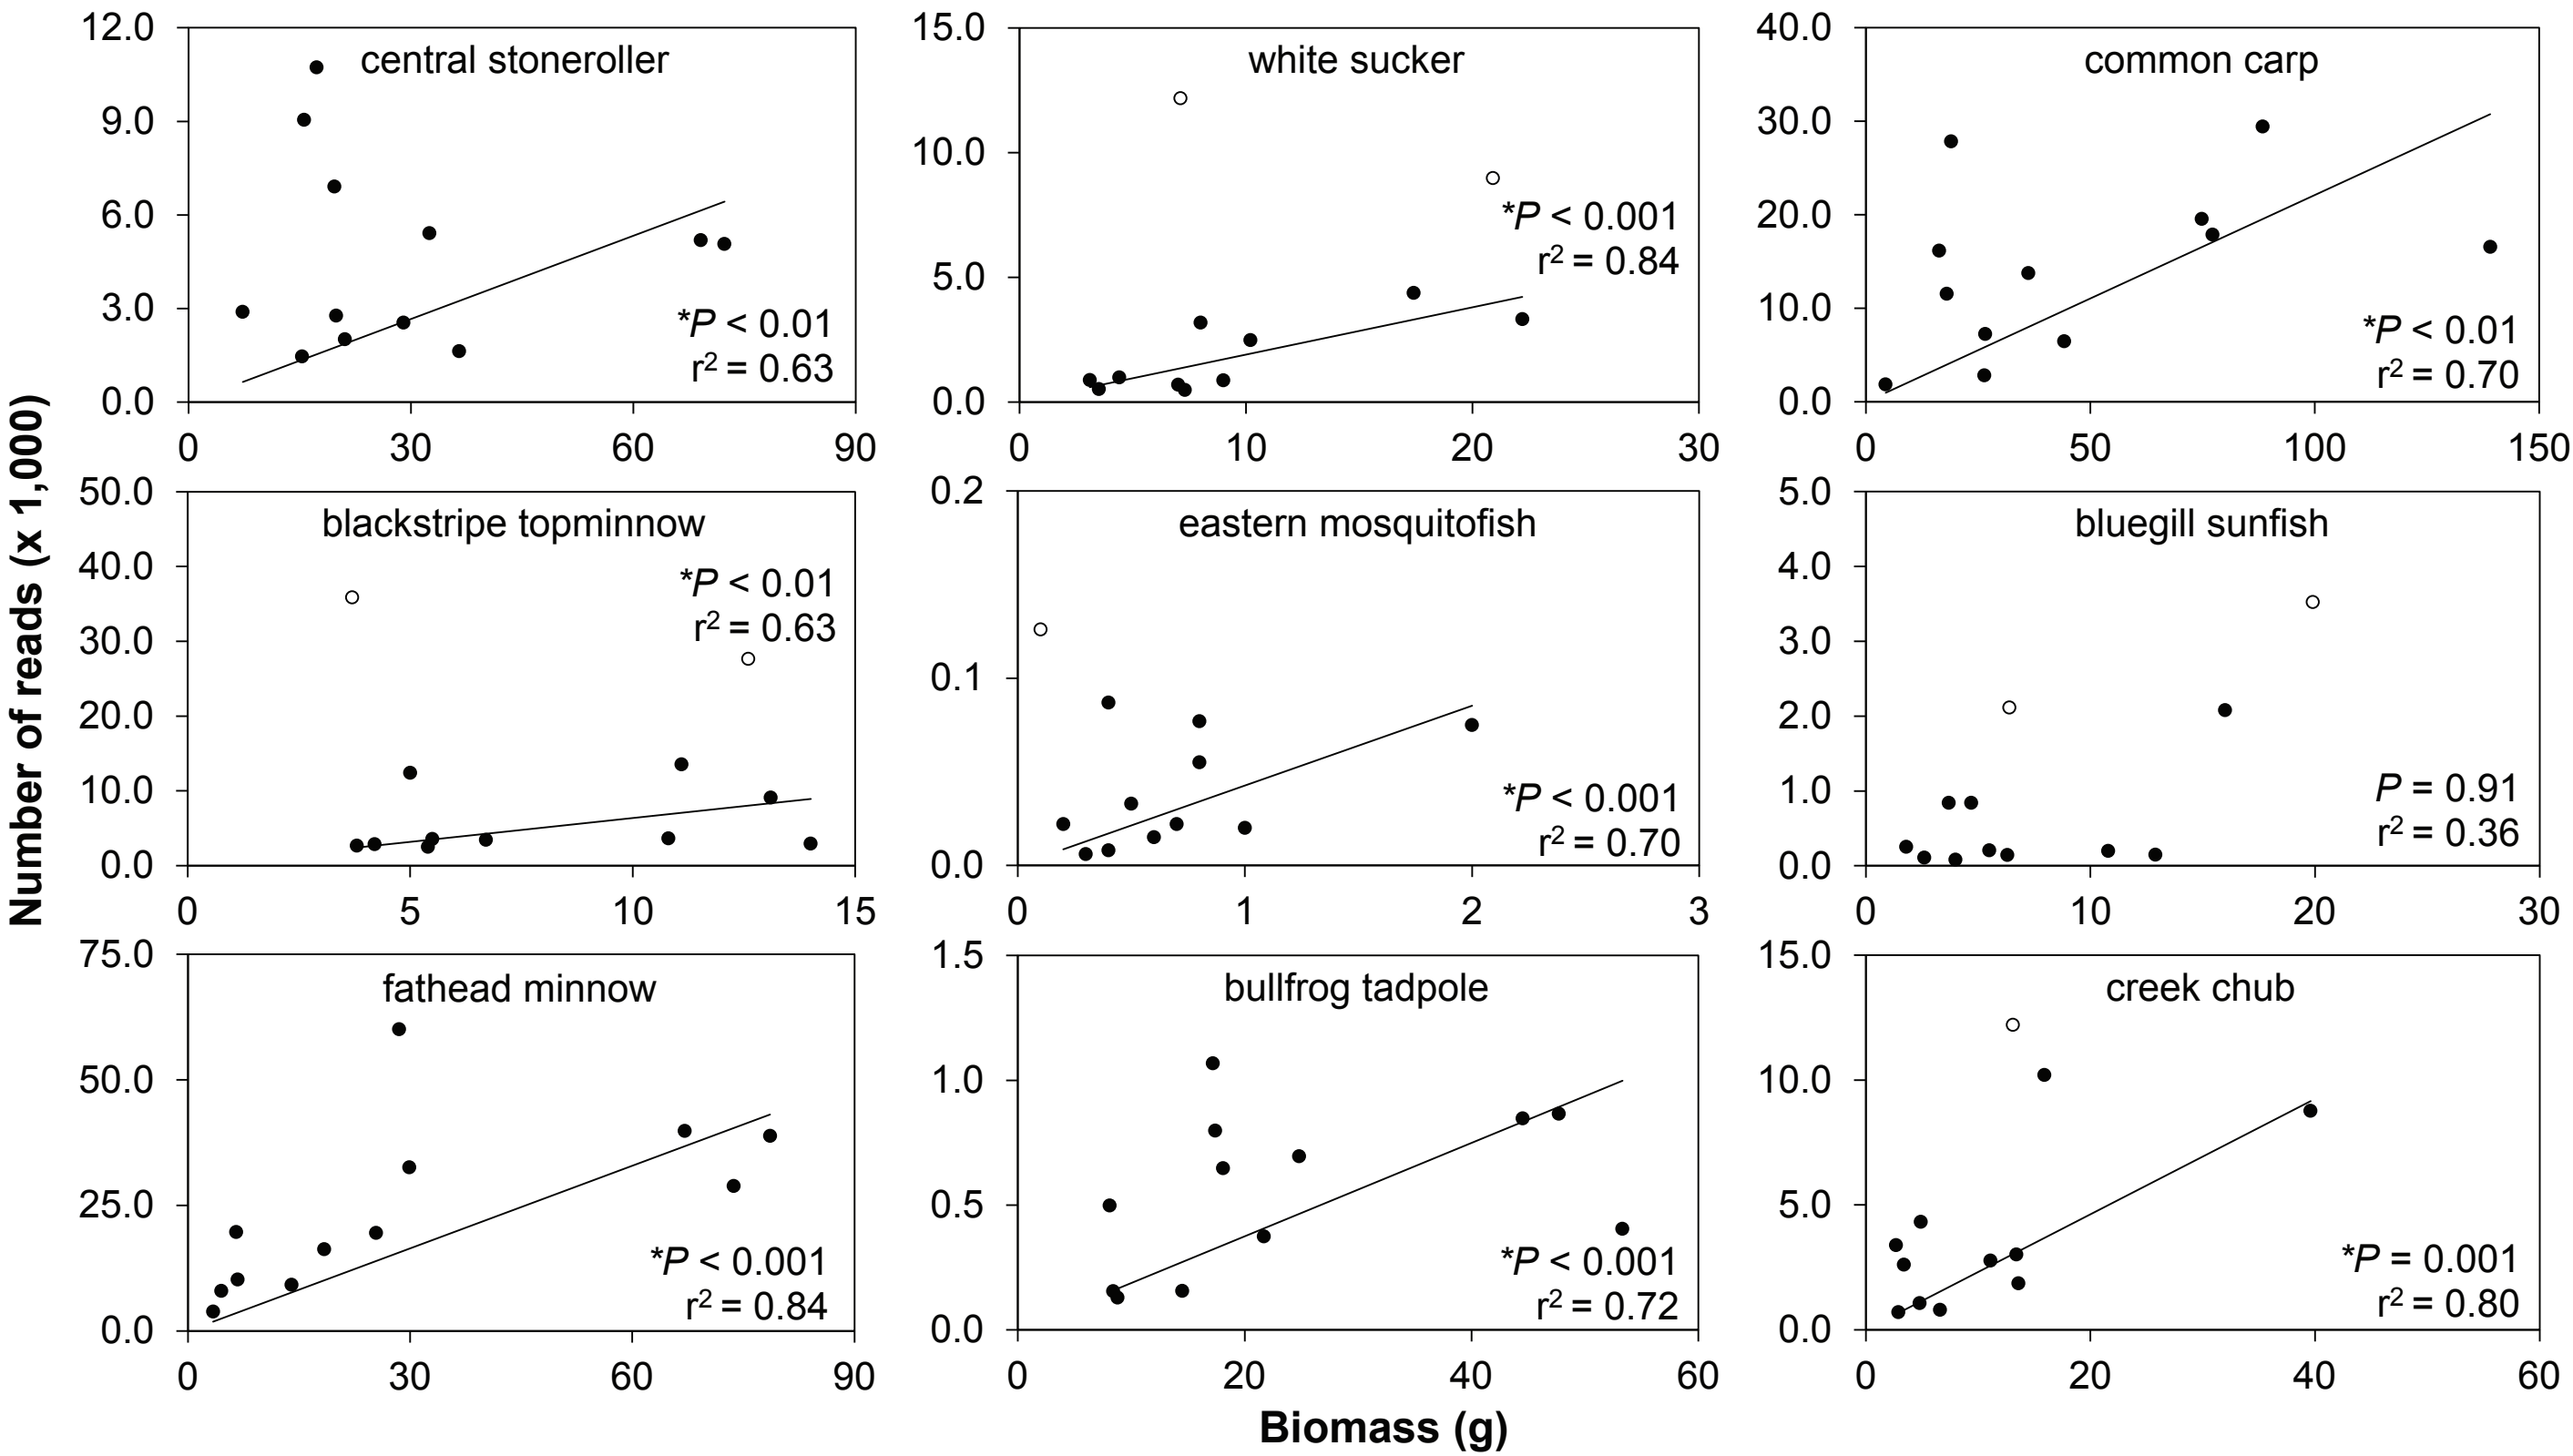

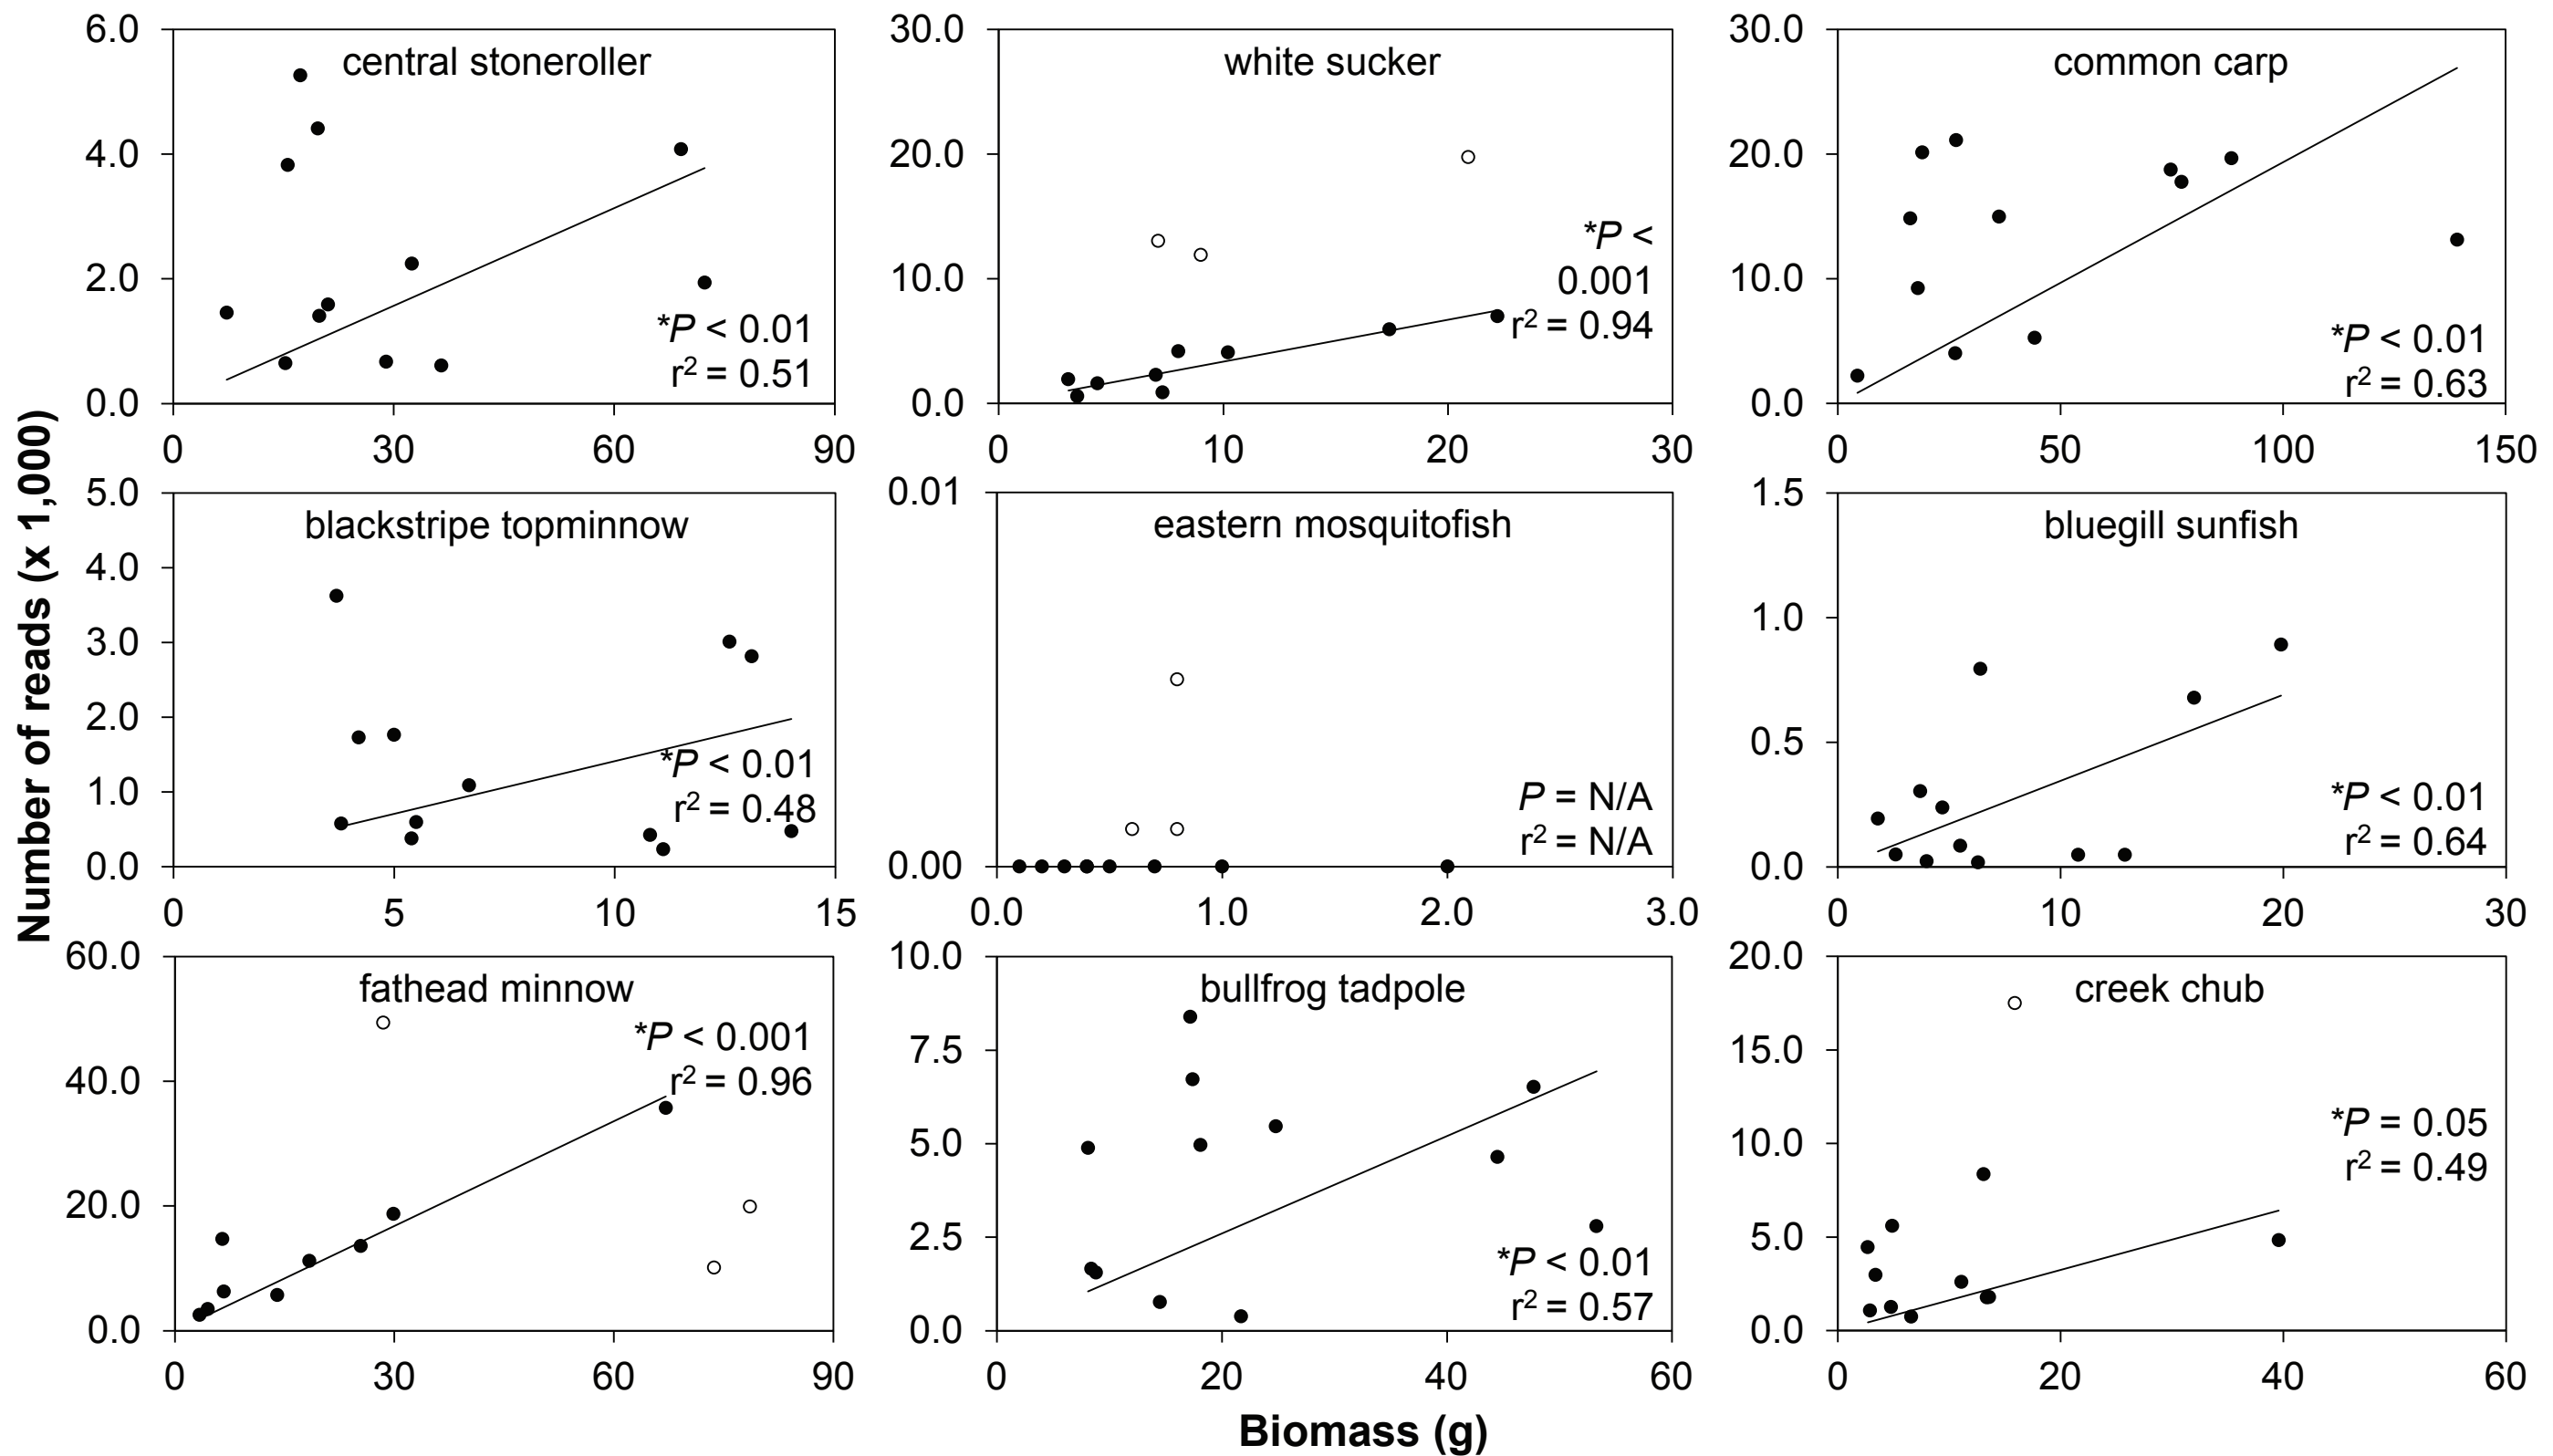

Supplement: MEN-16-29-s001.pdf [file MEN-16-29-s001.pdf]
